# Supplementary material for: Evidence for acoustic communication among bottom foraging humpback whales
Source: PubMed Central journal article supplement — Sci Rep. 2014 Dec 16;4:7508. doi: 10.1038/srep07508 (PMC4267198; doi:10.1038/srep07508), 2014-12-16
Supplement: srep07508-s3.pdf [file srep07508-s3.pdf]

Title: **Evidence for acoustic communication among bottom foraging humpback whales**

**Authors:** Susan E. Parks<sup>\*1</sup>, Dana A. Cusano<sup>1</sup>, Alison K. Stimpert<sup>2</sup>, Mason T. Weinrich<sup>3</sup>, Ari S. Friedlaender<sup>4</sup>, David N. Wiley<sup>5</sup>

1- Department of Biology, Syracuse University, Syracuse, NY 13244, U.S.A

2- Moss Landing Marine Laboratories, Moss Landing, CA, 95039, U.S.A.

3- Whale Centre of New England, Gloucester, Massachusetts 01931, U.S.A

4- Oregon State University Marine Mammal Institute, Newport, OR 97365, U.S.A.

5- Stellwagen Bank National Marine Sanctuary, NOAA National Ocean Service, Scituate, MA 02066, U.S.A

\*- Corresponding author email: [sparks@syr.edu](mailto:sparks@syr.edu)

**Supplementary Table S1.** Overview of all DTAGs included in analysis. Individual whales tagged on more than one occasion are highlighted with an asterix (\*). Unk – Unknown value. Age class/sex- A-Adult, J-Juvenile, C-calf, M-male, F-female.

| year | tag ID | whale ID                  | age class/sex | bottom feeding | paired bursts | # focal bouts (total bouts) |
|------|--------|---------------------------|---------------|----------------|---------------|-----------------------------|
| 2007 | mn198d | Ampersand                 | A/M           | No             | No            | -                           |
| 2012 | mn178a | Aswan                     | Unk/M         | Yes            | No            | -                           |
| 2008 | mn183a | Cajun                     | A/F           | No             | No            | -                           |
| 2012 | mn175a | Calderas                  | Unk/F         | No             | No            | -                           |
| 2007 | mn198a | Cantilever (Fulcrum Calf) | C/Unk         | Yes            | No            | -                           |
| 2008 | mn190a | Cardhu                    | A/F           | Yes            | No            | -                           |
| 2010 | mn96a  | Convict                   | Unk/Unk       | Unk            | No            | -                           |
| 2004 | mn191a | Deuce                     | A/F           | Yes            | Yes           | 62 (101)                    |
| 2006 | mn189b | Division*                 | A/F           | No             | No            | -                           |
| 2006 | mn192a | Division*                 | A/F           | Yes            | Yes           | 21 (192)                    |
| 2009 | mn108a | Division*                 | A/F           | Yes            | Yes           | 6 (220)                     |
| 2009 | mn206a | Draco                     | A/M           | No             | No            | -                           |
| 2006 | mn196a | Dyad                      | A/F           | Yes            | Yes           | 0 (62)                      |
| 2009 | mn201a | Entropy*                  | A/F           | Yes            | Yes           | 112 (139)                   |
| 2012 | mn173a | Entropy*                  | A/F           | No             | No            | -                           |
| 2006 | mn195b | Epee                      | A/M           | No             | Yes           | 0 (1)                       |
| 2008 | mn184a | Etch-A-Sketch*            | A/F           | Yes*           | Yes           | 0 (5)                       |
| 2008 | mn192a | Etch-A-Sketch*            | A/F           | No             | No            | -                           |
| 2007 | mn197b | Exclaim                   | A/M           | No             | No            | -                           |
| 2008 | mn189a | Falcon                    | A/M           | Yes            | Yes           | 514 (660)                   |
| 2009 | mn201c | Fern                      | A/F           | No             | No            | -                           |
| 2009 | mn201b | Fern's 2009 Calf          | C/Unk         | Yes            | No            | -                           |
| 2006 | mn195a | Fulcrum*                  | A/F           | Yes            | Yes           | 206 (218)                   |
| 2007 | mn198b | Fulcrum*                  | A/F           | No             | No            | -                           |
| 2012 | mn180b | Ganesh                    | Unk/F         | No             | Yes           | 0 (3)                       |
| 2007 | mn202a | Geometry                  | A/M           | No             | No            | -                           |
| 2006 | mn200b | Glowstick                 | A/F           | No             | No            | -                           |
| 2007 | mn198c | Grackle                   | A/M           | No             | No            | -                           |
| 2012 | mn176b | Gumdrop                   | Unk/F         | No             | No            | -                           |
| 2008 | mn189b | Hancock                   | A/F           | Yes            | Yes           | 0 (12)                      |
| 2008 | mn196a | Isthmus                   | A/F           | No             | No            | -                           |
| 2006 | mn197a | Ivee                      | A/F           | Yes            | Yes           | 11 (17)                     |
| 2009 | mn203c | Jabiru                    | A/F           | No             | No            | -                           |
| 2009 | mn203a | Lavalier's 2009 Calf      | C/Unk         | Yes            | No            | -                           |
| 2008 | mn182a | Lavalier*                 | A/F           | Yes            | Yes           | 0 (62)                      |
| 2009 | mn203b | Lavalier*                 | A/F           | Yes            | No            | -                           |

|      |        |           |         |      |     |           |
|------|--------|-----------|---------|------|-----|-----------|
| 2004 | mn191b | Leinid    | Unk/M   | Yes  | Yes | 180 (300) |
| 2009 | mn210a | Milkyway  | A/F     | No   | No  | -         |
| 2006 | mn192b | Nile*     | A/F     | No   | No  | -         |
| 2008 | mn184b | Nile*     | A/F     | Yes  | Yes | 4 (150)   |
| 2012 | mn173b | Oreo      | Unk/F   | No   | No  | -         |
| 2004 | mn189b | Parens    | A/M     | Yes  | Yes | 42 (72)   |
| 2004 | mn189a | Pepper*   | A/F     | Yes  | Yes | 2 (11)    |
| 2008 | mn184c | Pepper*   | A/F     | Yes  | No  | -         |
| 2008 | mn183b | Perseid   | A/F     | Yes  | Yes | 3 (3)     |
| 2006 | mn200a | Roswell   | A/F     | No   | No  | -         |
| 2009 | mn206b | Samovar   | A/F     | Yes  | Yes | 1 (67)    |
| 2006 | mn200c | Spoon     | A/F     | Yes  | Yes | 59 (62)   |
| 2006 | mn189a | Thalassa  | A/F     | No   | No  | -         |
| 2012 | mn173c | Touche    | Unk/M   | Yes* | Yes | 1 (1)     |
| 2006 | mn188a | Underline | A/M     | No   | No  | -         |
| 2010 | mn102a | Unk       | Unk/Unk | No   | No  | -         |
| 2009 | mn210b | Upsilon   | A/M     | Yes  | No  | -         |
| 2006 | mn196b | Ursa      | A/F     | No   | No  | -         |
| 2009 | mn209a | Valley    | A/F     | No   | No  | -         |
| 2006 | mn188b | Ventisca  | A/F     | Yes  | No  | -         |
| 2006 | mn189c | Zipper    | A/F     | No   | No  | -         |
